# Producing irreversible topoisomerase II-mediated DNA breaks by site-specific Pt(II)-methionine coordination chemistry

Ying-Ren Wang<sup>1</sup>, Shin-Fu Chen<sup>1</sup>, Chyuan-Chuan Wu<sup>2</sup>, Yi-Wen Liao<sup>1</sup>, Te-Sheng Lin<sup>1</sup>, Ko-Ting Liu<sup>1</sup>, Yi-Song Chen<sup>3</sup>, Tsai-Kun Li<sup>3,4,\*</sup>, Tun-Cheng Chien<sup>5,\*</sup> and Nei-Li Chan<sup>1,6,\*</sup>

<sup>1</sup>Institute of Biochemistry and Molecular Biology, College of Medicine, National Taiwan University, Taipei 100, Taiwan, <sup>2</sup>Institute of Molecular Biology, Academia Sinica, Taipei 115, Taiwan, <sup>3</sup>Department and Graduate Institute of Microbiology, College of Medicine, National Taiwan University, Taipei 100, Taiwan, <sup>4</sup>Center for Biotechnology, National Taiwan University, Taipei 106, Taiwan, <sup>5</sup>Department of Chemistry, National Taiwan Normal University, Taipei 116, Taiwan and <sup>6</sup>Institute of Biochemistry, College of Life Sciences, National Chung Hsing University, Taichung 402, Taiwan

Received May 02, 2017; Revised August 9, 2017; Editorial Decision August 11, 2017; Accepted August 22, 2017

## ABSTRACT

Human type II topoisomerase (Top2) isoforms, hTop2 $\alpha$  and hTop2 $\beta$ , are targeted by some of the most successful anticancer drugs. These drugs induce Top2-mediated DNA cleavage to trigger cell-death pathways. The potency of these drugs correlates positively with their efficacy in stabilizing the enzyme-mediated DNA breaks. Structural analysis of hTop2 $\alpha$  and hTop2 $\beta$  revealed the presence of methionine residues in the drug-binding pocket, we therefore tested whether a tighter Top2-drug association may be accomplished by introducing a methionine-reactive Pt<sup>2+</sup> into a drug to further stabilize the DNA break. Herein, we synthesized an organoplatinum compound, etoplatin-N2 $\beta$ , by replacing the methionine-juxtaposing group of the drug etoposide with a *cis*-dichlorodiammineplatinum(II) moiety. Compared to etoposide, etoplatin-N2 $\beta$  more potently inhibits both human Top2s. While the DNA breaks arrested by etoposide can be rejoined, those captured by etoplatin-N2 $\beta$  are practically irreversible. Crystallographic analyses of hTop2 $\beta$  complexed with DNA and etoplatin-N2 $\beta$  demonstrate coordinate bond formation between Pt<sup>2+</sup> and a flanking methionine. Notably, this stable coordinate tether can be loosened by disrupting the structural integrity of drug-binding pocket, suggesting that Pt<sup>2+</sup> coordination chemistry may allow for the development of potent inhibitors

with protein conformation-dependent reversibility. This approach may be exploited to achieve isoform-specific targeting of human Top2s.

## INTRODUCTION

Imbalances in enzyme activity are etiological factors for numerous diseases, including inflammation, metabolic disorders, cardiovascular irregularities and cancers. Therefore, modulation of enzyme function by bioactive small molecules is a commonly employed therapeutic strategy and many successful drugs are enzyme inhibitors or poisons (1). The majority of drugs bind their targets via non-covalent forces, rendering the interactions reversible in nature. In contrast, irreversible inhibition has been achieved mainly via covalent bond formation between an inhibitor and its target (2,3). Despite the superior *in vitro* potency displayed by these so-called covalent inhibitors, their broader clinical applications are usually limited by pronounced adverse effects due to off-target reactivity and potential immunogenicity arising from the resulting protein-inhibitor adducts (4–6). Knowing that the stability of coordination complexes is determined in part by the number and geometric distribution of metal-coordinating ligands (7), we envisioned that the coordination bond formed between a transition metal ion incorporated in an organic scaffold and reactive side chain functional group(s) in a target protein may exhibit conditional lability. Perturbing the conformational state of the target protein may alter the spatial arrangement of ligands, leading to rupture of the coordination linkage. Here, we performed structure-based development of an organoplatinum compound capable of inducing type II topoisomerase (Top2)-mediated DNA breaks

\*To whom correspondence should be addressed. Tel: +886 223 562 214; Fax: +886 223 915 295; Email: nlchan@ntu.edu.tw  
Correspondence may also be addressed to Tun-Cheng Chien. Tel: +886 277 346 126; Fax: +886 229 324 249; Email: tcchien@ntnu.edu.tw  
Correspondence may also be addressed to Tsai-Kun Li. Tel: +886 222 123 456 (Ext 88287/88294); Fax: +886 223 915 293; Email: tsaikunli@ntu.edu.tw

to show that the generally irreversible and thus highly efficient enzyme-targeting based on  $\text{Pt}^{2+}$  coordination chemistry may become dissociable upon protein unfolding, which illustrates a potential benefit of employing metal coordination chemistry in drug development.

Top2 resolves topological entanglements in DNA by first catalyzing the formation of a transient covalent enzyme–DNA adduct termed Top2 cleavage complex (Top2cc), which harbors a double-strand DNA break to allow for the following passage of another DNA segment (8,9). A number of clinically active anticancer drugs arrest the transiently formed Top2cc to exploit its latent yet lethal cytotoxicity; subsequent collision between the trapped Top2cc and DNA-tracking activities generates a bulky DNA lesion and in turn causes cell death (10–13). Structural analyses revealed drug intercalation between the base pairs flanking the DNA cleavage site, which effectively stabilizes Top2cc by blocking religation of the cleaved DNA ends (14–18). The specificity displayed by these drugs toward the Top2-induced DNA cleavage site can be rationalized by their interactions with the surrounding protein residues. The presence of methionine residue(s) in the drug-binding pocket in the two human Top2 isoforms (14,16,19), hTop2 $\alpha$  and hTop2 $\beta$ , suggest that site-specific incorporation of a  $\text{Pt}^{2+}$  reactive center into a drug may enable the formation of a  $\text{Pt}^{2+}$ –thioether bond with the methionine side chain and boost the drug's efficacy by strengthening its interaction with Top2cc.

## MATERIALS AND METHODS

### Chemical synthesis of etoplatins

Refer to Supporting Online Material for a detailed description of the synthetic scheme (Supplementary Schemes S1–3).

### Construction, expression and purification of recombinant proteins

The coding sequence of hTop2 $\alpha^{\text{core}}$  (residues 429–1188, the DNA binding and cleavage core of hTop2 $\alpha$ ) was subcloned into pET51b (Novagen) from the YEpWob6 plasmid (20). The resultant plasmid (named 51bDBCC $\alpha$ ), as well as the 51bDBCC $\beta$  plasmid (harbors the coding sequence of hTop2 $\beta^{\text{core}}$  (residues 445–1201, the DNA binding and cleavage core of hTop2 $\beta$ )), was transformed to *Escherichia coli* BL21 (DE3) Star for protein expression. The constructed YEpWob6 and YEpTOP2B plasmids (21,22) respectively harboring the coding sequences of hTop2 $\alpha^{\Delta\text{CTD}}$  (residues 29–1221) and hTop2 $\beta^{\Delta\text{CTD}}$  (residues 45–1201) were delivered to yeast BCY123 cells for protein expression. The primer sequences for molecular cloning and further details of recombinant protein purification and preparation are listed in the Supplementary Material and Methods.

### Crystallization and post-crystallization drug replacement

Crystallization procedures used for preparing both hTop2 $\alpha^{\text{core}}$ –DNA–etoposide and hTop2 $\beta^{\text{core}}$ –DNA–etoposide ternary complexes have been described in our

previous work (14). Briefly, the protein solution for crystallization is composed of purified hTop2 $\alpha^{\text{core}}$ /hTop2 $\beta^{\text{core}}$  (5 mg/ml,  $\sim 28 \mu\text{M}$ ), 1 mM etoposide (diluted from 50 mM stock in pure dimethyl sulfoxide (DMSO)) and  $\sim 34 \mu\text{M}$  of the 20 bp dsDNA substrate (5'-AGCCGAGCTGCAGCTCGGCT-3') in gel filtration buffer (50 mM Tris–HCl (pH 7.0), 200 mM KCl, 5 mM  $\text{MnCl}_2$ , 1 mM ethylenediaminetetraacetic acid (EDTA), 2 mM  $\beta$ -mercaptoethanol). Then, 1  $\mu\text{l}$  of the protein solution was mixed with an equal amount of the reservoir solution (100 mM magnesium acetate, 50 mM 2-(N-morpholino)ethanesulfonic acid pH 5.6 and 26% 2-methyl-2,4-pentanediol (MPD)) and equilibrated against 200  $\mu\text{l}$  of the reservoir solution using the hanging-drop vapor diffusion method with VDX<sup>TM</sup> plate (Hampton Research) at 4°C. Single crystals suitable for data collection usually appear within 2 weeks. Crystals were harvested by transferring into mother liquor containing 30% MPD before looping and flash-freezing in liquid nitrogen for data collection.

We followed the previously described procedure for post-crystallization drug replacement (16) to obtain the hTop2 $\beta^{\text{core}}$  cleavage complex stabilized by etoplatin–N2 $\beta$  and etoplatin–N2 $\alpha$ . Briefly, etoposide was soaked out by transferring the hTop2 $\beta^{\text{core}}$ –DNA–etoposide crystal into mother liquor containing 30% MPD at 4°C for 16 h. Etoplatin–N2 $\beta$  and –N2 $\alpha$  were then soaked in by adding 1 mM of respective drug (dissolved in pure DMSO) to the drop containing drug-free crystals at 4°C for 16 h. All of the crystals were harvested by transferring into mother liquor containing 30% MPD before looping and flash-freezing in liquid nitrogen for data collection. To test the stability/reversibility of the resultant hTop2 $\beta^{\text{core}}$ –DNA–etoplatin–N2 $\beta$  and hTop2 $\beta^{\text{core}}$ –DNA–etoplatin–N2 $\alpha$  complexes, these etoplatin-bound crystals were subjected to two additional soaking steps before being harvested for data collection: first in drug-free mother liquor (16 h at 4°C) followed by a second soaking (1–7 days at 4°C) in mother liquor containing another hTop2-targeting drug mitoxantrone (1 mM).

### Data collection and structure determination

All diffraction datasets were collected at National Synchrotron Radiation Research Center (NSRRC), Taiwan (beamlines BL13B1 and BL15A1) and processed using the HKL2000 program suite (23). The structure of hTop2 $\alpha^{\text{core}}$ –DNA–etoposide was solved by molecular replacement (MR) with phenix.automr using the hTop2 $\beta^{\text{core}}$ –DNA complex taken from the hTop2 $\beta^{\text{core}}$ –DNA–etoposide structure (PDB ID: 3QX3) (14) as a search model followed by model building with phenix.autobuild (24). One cleavage complex was found per asymmetric unit. The bound drugs were built into the  $F_o$ – $F_c$  density maps manually using Coot (25), the structure then underwent rounds of manual model rebuilding and refinement with Coot and phenix.refine. The structures of hTop2 $\beta^{\text{core}}$ –DNA–etoplatin–N2 $\beta$  and hTop2 $\beta^{\text{core}}$ –DNA–etoplatin–N2 $\alpha$  were also solved by MR using the program and search model mentioned above. After subjecting the MR solutions to rigid body and positional refinement with phenix.refine, the three main compo-

nents of etoplatins (the aglycone core, E-ring and dichlorodiammineplatinum(II) moiety; see Figure 1) can be unambiguously placed in the resulting  $F_o - F_c$  maps. For the etoplatin-N2 $\beta$ -bound structure, continuous electron density was observed between Pt<sup>2+</sup> and the side chain S <sup>$\delta$</sup>  of M782, with the S <sup>$\delta$</sup>  replacing one of the Pt<sup>2+</sup>-coordinating Cl<sup>-</sup> ions, indicating the formation a Pt<sup>2+</sup>-S coordinate bond. Subsequent refinement cycles were performed by restraining the Pt<sup>2+</sup>-S, Pt<sup>2+</sup>-N, and Pt<sup>2+</sup>-Cl<sup>-</sup> bond lengths to averaged values seen in four-coordinated Pt(II) complexes and the four ligands to arrange in a square planar geometry (26). Because no coordinate bond was observed between etoplatin-N2 $\alpha$  and protein, the stereochemical parameters derived from the high-resolution structure of cisplatin were applied to restrain the dichlorodiammineplatinum(II) moiety during the refinement of etoplatin-N2 $\alpha$ -bound structure. Additional details on model building and refinement of the etoplatin-bound structures are described in the Supplementary Material and Methods. The data collection and refinement parameters are listed in Table 1.

### Structural modeling of etoplatin-stabilized hTop2 $\alpha$ cleavage complexes

Structural models were constructed by first replacing the bound etoposide molecules in the crystal structure of hTOP2 $\alpha$ <sup>core</sup>-DNA-etoposide with etoplatin-N2 $\beta$  and N2 $\alpha$ , respectively, under the assumption that the aglycone core and E-ring of the three compounds (Figure 1) share the same binding mode. The linker that connects the reactive dichlorodiammineplatinum(II) moiety to the aglycone C-ring was also assumed to adopt the conformation observed in the crystal structures of hTop2 $\beta$ <sup>core</sup>-DNA-etoplatin-N2 $\beta$  and hTop2 $\beta$ <sup>core</sup>-DNA-etoplatin-N2 $\alpha$  complexes. Next, all energetically accessible rotamers of the hTOP2 $\alpha$ -specific M762 were surveyed to identify side-chain conformations that allow its S <sup>$\delta$</sup>  to overlay on and substitute for one of the Cl<sup>-</sup> ions of the dichlorodiammineplatinum(II) moiety as a ligand for Pt<sup>2+</sup>. The Pt<sup>2+</sup>-S <sup>$\delta$</sup>  bond length was then restrained at  $\sim 2.3$  Å during subsequent energy minimization using the 'In Situ Ligand Optimization' and 'Calculate Binding Energies' modules of Discovery Studio 4.1 to idealize the drug-binding mode. For the additionally designed Pt<sup>2+</sup> derivatives, structural modeling was conducted using the same procedure except that the conformations of the linker and the M762 side chain were both adjusted to allow the formation of Pt<sup>2+</sup>-S <sup>$\delta$</sup>  bond.

### Supercoil relaxation and DNA cleavage assays

The supercoil relaxation reaction (20  $\mu$ l) was conducted at 37°C for 30 min in a buffer containing 10 mM Tris-HCl pH 8.0, 100 mM KCl, 0.1 mM EDTA, 5 mM MgCl<sub>2</sub>, 1 mM adenosinetriphosphate (ATP), 100  $\mu$ g/ml bovine serum albumin (BSA) and 300 ng supercoiled (SC) pRYG plasmid DNA, with a titration of the indicated drug from 10 to 250 nM. A total of 120 ng/ $\mu$ l of hTop2 $\Delta$ <sup>CTD</sup> was added to start the reaction. The reaction was terminated by the addition of 0.4  $\mu$ l of 0.5% sodium dodecyl sulphate (SDS) and 0.8  $\mu$ l of 250 mM EDTA and incubated at 37°C for 1 h. The DNA cleavage reaction (20  $\mu$ l) was conducted at 37°C for

30 min in a buffer composed of 1 mM ATP, 100  $\mu$ g/ml BSA, 250 ng of HindIII-linearized pRYG plasmid DNA, 20 nM of indicated drug and 1.2  $\mu$ g/ $\mu$ l of hTop2 $\Delta$ <sup>CTD</sup>. The cleavage reaction was terminated by the addition of 2  $\mu$ l of 5% SDS followed by 2  $\mu$ l of 250 mM EDTA. The enzyme was digested by the addition of 2  $\mu$ l proteinase K (0.8 mg/ml) and incubation at 45°C for 30 min. For reactions aiming to test the reversibility of DNA cleavage by the enzymes, EDTA was added to the reactions prior to adding SDS at the termination step. The resultant reaction mixtures from both assays were resolved by electrophoresis on 1% agarose gel followed by standard ethidium bromide (EtBr) staining analysis.

### Measuring Pt<sup>2+</sup> concentration by ICP-MS

To measure the release of etoplatin-N2 $\alpha$  and -N2 $\beta$  from the Top2 cleavage complex, we employed inductively coupled plasma mass spectrometry (ICP-MS) (27), a superior technique for quantitative and ultrasensitive elemental analysis, to detect the platinum signal from the released drugs. The drug-stabilized Top2cc (in a 20  $\mu$ l reaction) was prepared in a buffer containing 1 mM ATP, 100  $\mu$ g/ml BSA, 1  $\mu$ M of a 30 bp double-stranded DNA, 0.5  $\mu$ M etoplatin-N2 $\alpha$  or -N2 $\beta$  and 1.2  $\mu$ M of hTop2 $\alpha$  <sup>$\Delta$ CTD</sup>. After incubating the mixture at 37°C for 30 min, guanidine hydrochloride (GdnHCl) was added to a final concentration of 1.2 M. Aliquots (10  $\mu$ l) were sampled at different time points and then diluted with ddH<sub>2</sub>O to a volume of 100  $\mu$ l. The sample was then filtered using a 10 kDa-cutoff filter membrane (UFC501096, Amicon Ultra 0.5 ml centrifugal filter) to separate the released (and thus membrane-permeable) drug from those that remained associated with Top2cc. A total of 20  $\mu$ l of flow-through containing the released drugs was diluted again with ddH<sub>2</sub>O to a final volume of 3 ml. The resultant sample was then subjected to platinum content determination with an Agilent 7700 $\times$  ICP-MS in the instrument center of National Taiwan University.

### Cell lines, comet assay, quantitative measurement and statistical analysis

Parental HL-60 and its hTop2-deficient HL-60/MX2 leukemia cell lines were obtained from the American Type Culture Collection (ATCC) (28). Both cells were cultivated in Roswell Park Memorial Institute-1640 medium (RPMI) 1640 supplemented with 10% fetal calf serum. A total of 100 units/ml penicillin, 100  $\mu$ g/ml streptomycin and 2 mM glutamine in a 5% CO<sub>2</sub> incubator at 37°C. Comet assay was used to determine chromosome DNA breaks (29). Briefly, cells ( $2 \times 10^5$ ) were treated with etoposide or etoplatins for 1 h, then the cells were collected and re-suspended in 1 ml ice-cold 1 $\times$  phosphate-buffered saline buffer. Drug-treated cells (50  $\mu$ l) were mixed with 0.1 ml of pre-warmed low-melting-point agarose (0.7%) and loaded onto a fully frosted slide that had been pre-coated with 0.7% agarose. The slide was then covered with a coverslip and subsequently submerged in the pre-chilled lysis solution for 0.5 h at 4°C. After soaking with electrophoresis buffer for 40 min, the slides were subjected to electrophoresis for 20 min at 2 V/cm. DNA on the slides was stained with Sybr-

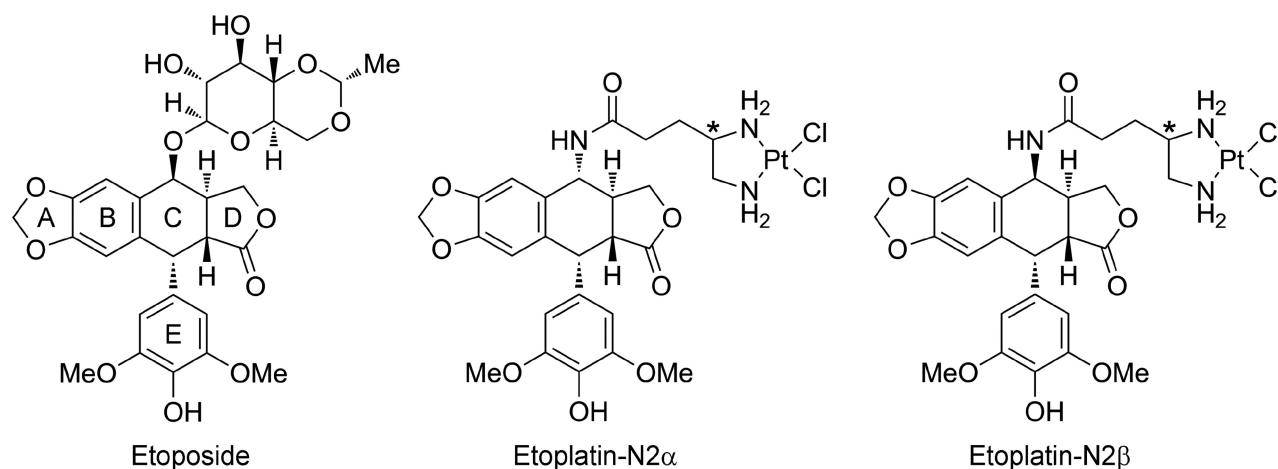

**Figure 1.** Chemical structures of etoposide and the two etoplatins synthesized in this study. The polycyclic aglycone (rings A–D) and pendant ring (E-ring) of etoposide are labeled. A *cis*-dichlorodiammineplatinum(II) moiety was introduced via an amide linkage to the C4 position of the aglycone core in  $\alpha$  and  $\beta$  configuration about the E-ring to produce etoplatin-N2 $\alpha$  and N2 $\beta$ , respectively. Both etoplatins contain an additional chiral center (marked with asterisks) whose chirality was not specified during synthesis.

**Table 1.** Summary of crystallographic analysis

| Protein                                               | hTop2 $\beta$ <sup>core</sup> |                               | hTop2 $\alpha$ <sup>core</sup>           |
|-------------------------------------------------------|-------------------------------|-------------------------------|------------------------------------------|
|                                                       | 5GWJ<br>Etoplatin-N2 $\beta$  | 5GWI<br>Etoplatin-N2 $\alpha$ | 5GWK<br>Etoposide                        |
| Space group                                           | <i>P</i> 2 <sub>1</sub>       |                               | <i>P</i> 2 <sub>1</sub> 2 <sub>2</sub> 1 |
| Unit cell                                             |                               |                               |                                          |
| Dimensions                                            |                               |                               |                                          |
| <i>a</i> , <i>b</i> , <i>c</i> (Å), $\beta$ (degrees) | 80.18, 177.0, 94.41, 111.5    | 79.79, 176.97, 94.53, 112.3   | 105.11, 126.16, 198.86                   |
| Data collection                                       |                               |                               |                                          |
| Resolution range (Å)                                  | 29.64–2.57 (2.66–2.57)        | 29.68–2.74 (2.84–2.74)        | 27.42–3.15 (3.27–3.15)                   |
| Observed reflections                                  | 290555                        | 226170                        | 309096                                   |
| Unique reflections                                    | 77673 (7441)                  | 62535 (6108)                  | 45909 (4494)                             |
| Multiplicity                                          | 3.7 (3.7)                     | 3.6 (3.4)                     | 6.7 (6.7)                                |
| Completeness (%)                                      | 99.9 (99.8)                   | 98.2 (96.7)                   | 99.2 (99.7)                              |
| Mean <i>I</i> / $\sigma$ ( <i>I</i> )                 | 15.7 (2.8)                    | 13.6 (3.0)                    | 24.6 (3.7)                               |
| Rsym <sup>a</sup> (last shell) (%)                    | 0.08 (0.484)                  | 0.087 (0.469)                 | 0.062 (0.48)                             |
| CC1/2                                                 | 0.952 (0.801)                 | 0.957 (0.815)                 | 0.988 (0.947)                            |
| Data refinement                                       |                               |                               |                                          |
| Wilson B-factor                                       | 39.94                         | 49.32                         | 92.61                                    |
| R <sub>crys</sub> <sup>b</sup> (%)                    | 0.18                          | 0.21                          | 0.20                                     |
| R <sub>free</sub> <sup>b</sup> (%)                    | 0.22                          | 0.25                          | 0.24                                     |
| RMSD (bonds)                                          | 0.004                         | 0.002                         | 0.002                                    |
| RMSD (angles)                                         | 0.743                         | 0.526                         | 0.566                                    |
| Ramachandran <sup>c</sup>                             |                               |                               |                                          |
| favored (%)                                           | 96.5                          | 96.5                          | 96.1                                     |
| outliers (%)                                          | 0.0                           | 0.0                           | 0.0                                      |
| Clashscore                                            | 3.54                          | 3.16                          | 3.26                                     |
| Average B-factor                                      | 46.6                          | 51.7                          | 108.1                                    |

Statistics for the highest-resolution shell are shown in parentheses.

<sup>a</sup>Rsym =  $(\sum |I_{hkl} - \langle I \rangle|) / (\sum I_{hkl})$ , where the average intensity (*I*) is taken overall symmetry equivalent measurements and *I*<sub>hkl</sub> is the measured intensity for any given reflection.

<sup>b</sup>R<sub>crys</sub> =  $(\sum ||F_o| - k|F_c||) / (\sum |F_o|)$ . R<sub>free</sub> = R<sub>crys</sub> for a randomly selected subset (5%) of the data that were not used for minimization of the crystallographic residual.

<sup>c</sup>Categories were defined by PHENIX (24). All non-glycine residues are included for this analysis.

Gold (Molecular Probes, USA), visualized under a fluorescent microscope (Nikon Eclipse 80i, assay, over 100 cells were typically scored to calculate the percentage (%) of cell with comet tails. The quantitative results were analyzed and graphed using Prism 6.0 (GraphPad Software Inc.) and statistical analyses were performed with the unipolar paired student's *t*-test. The data were considered statistically sig-

nificant (*P*-values > 0.05, marked as \* and 0.01, \*\*) or very significant (*P*-values > 0.001, \*\*\*).



## RESULTS

## Structure-based design of an hTop2-targeting organoplatinum compound

The anticancer drug etoposide is an ideal candidate for testing the suitability of employing the  $\text{Pt}^{2+}$  coordinate chemistry in hTop2-targeting due to the well comprehended structure-activity relationships regarding its three constituting moieties (Figure 1) (16). The tetracyclic aglycone core composed of rings A–D mediates DNA intercalation and the appended E-ring provides specific interactions with protein residues located on the DNA minor groove side; both moieties are required for optimal drug action and are sensitive to modifications. Conversely, the pocket that houses the glycosidic group on the DNA major groove side not only is spacious enough to accommodate structurally distinct chemical groups, but also harbors potentially  $\text{Pt}^{2+}$ -reactive methionine residue(s) (14,19). Replacing the glycosidic moiety with a  $\text{Pt}^{2+}$ -containing group may thus allow for the formation of  $\text{Pt}^{2+}$ -thioether bond between the drug and hTop2 isoforms. A diammine linker has previously been used successfully to introduce  $\text{Pt}^{2+}$  into podophyllotoxin (30). Our modeling analysis suggested that adjusting the length of the reported linker should place the  $\text{Pt}^{2+}$  within a favorable distance for conjugating to a nearby methionine and confers the resulting compounds potent Top2-poisoning activity. We propose to name these compounds etoplatins, representing  $\text{Pt}^{2+}$ -conjugated etoposide derivatives. Two first generation etoplatins, N2 $\beta$  and N2 $\alpha$ , which differ in chirality by which the diammine linker attaches to the C4 position of the aglycone core, were designed and synthesized (Figure 1 and Supplementary Schemes S1–3). The synthesis of etoplatin-N2 $\beta$  and N2 $\alpha$  (**5 $\beta$**  and **5 $\alpha$** , respectively) started with the preparation of the platinum(II)-diamino-carboxylic acid complex **2** followed by the amide bond formation with 4-amino-4-deoxy-4'-*O*-demethylpodophyllotoxin (**4**). The platinum(II)-4,5-diaminoveraleric acid complex ( $\text{PtCl}_2(N,N\text{-Dav})$ , **2**) was obtained from the reaction of potassium tetrachloroplatinate(II) with 4,5-diaminoveraleric acid **1** (31). The (4*S*)- and (4*R*)-4-amino-4-deoxy-4'-*O*-demethylpodophyllotoxins (**4 $\beta$**  and **4 $\alpha$** , respectively) were prepared from 4'-*O*-demethyl-4-*epi*-podophyllotoxin **3** according to literature procedure (32). Subsequently, the amide bond formation between  $\text{PtCl}_2(N,N\text{-Dav})$  (**2**) and 4-amino-4-deoxy-4'-demethylpodophyllotoxins (**4 $\beta$**  and **4 $\alpha$** , respectively) was accomplished by the reaction with *N*-ethyl-*N'*-(3-dimethylaminopropyl)carbodiimide hydrochloride and 1-hydroxybenzotriazole in *N,N*-dimethylformamide to produce etoplatin-N2 $\beta$  and N2 $\alpha$ .

Etoplatin-N2 $\beta$  potently inhibits the supercoil relaxation activity of human Top2 isoforms

To examine the effects of etoplatins on the catalytic functions of Top2, we first compared the potency of these platinum organometallic compounds in blocking the Top2-mediated DNA relaxation to that of etoposide (Figure 2A and Supplementary Figure S1). While etoplatin-N2 $\alpha$  and etoposide displayed similar inhibitory activities, a 25-fold lower concentration of etoplatin-N2 $\beta$  is sufficient to pro-

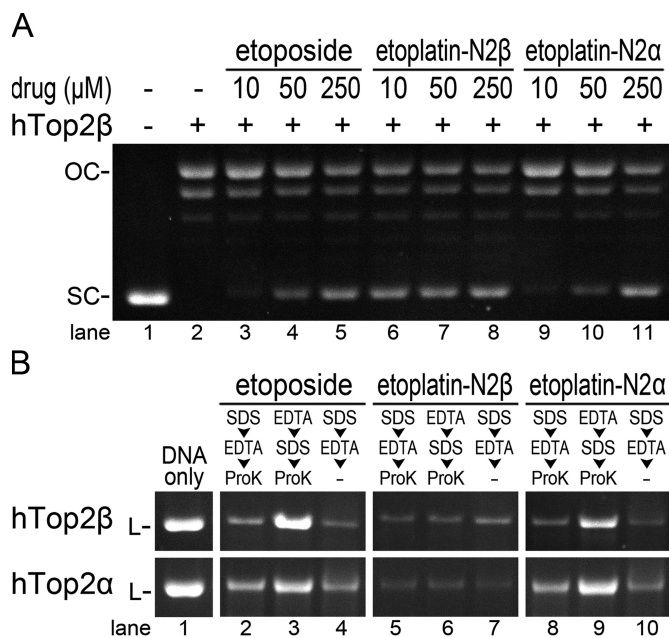

**Figure 2.** Etoplatin-N2 $\beta$ , but not the N2 $\alpha$  epimer, more potently inhibits the supercoil relaxation activity of Top2 by inducing the formation of ethylenediaminetetraacetic acid (EDTA)-resistant DNA breaks. (A) Inhibition of the relaxation activity of hTop2 by etoposide and etoplatins. Each relaxation reaction contains 300 ng of supercoiled (SC) pRYG plasmid DNA. The enzyme-positive reactions contain 80 ng of hTop2 $\beta^{\Delta\text{CTD}}$  (designated as hTop2 $\beta$ ). OC stands for open circle (full-relaxed product produced by Top2) DNA. (B) The DNA cleavage assay shows the production of EDTA-resistant, hTop2-mediated DNA breaks in the presence of etoplatin-N2 $\beta$ . Each cleavage reaction contains 250 ng of HindIII-linearized (L) pRYG plasmid DNA. A total of 1.2  $\mu\text{g}$  of hTop2 $\beta^{\Delta\text{CTD}}$  (upper panel, designated as hTop2 $\beta$ ) or hTop2 $\alpha^{\Delta\text{CTD}}$  (lower panel, designated as hTop2 $\alpha$ ) was added to the respective enzyme-positive reactions. To stop the cleavage reaction, Sodium dodecyl sulphate (SDS) and EDTA were added in the indicated order and the denatured enzyme was removed by proteinase K digestion. Lanes labeled with -ProK indicates no proteinase K treatment after the reaction was stopped. The disappearance and reemergence of the linear substrate DNA (L) indicate the production and resealing of DNA breaks, respectively. Refer to Supplementary Figure S2 for the full-sized image of this gel.

duce a comparable effect, indicating that etoplatin-N2 $\beta$  is significantly more effective in inhibiting the relaxation activity of both hTop2 $\alpha$  and hTop2 $\beta$ . Given that etoplatin-N2 $\beta$  is produced by replacing the glycosidic moiety of etoposide with a thioether-directed,  $\text{Pt}^{2+}$ -containing reactive center (Figure 1) and that both human Top2 isoforms exhibited increased sensitivity towards etoplatin-N2 $\beta$ , we reasoned that the  $\text{Pt}^{2+}$  center of etoplatin-N2 $\beta$  most likely forms a coordinate bond with the side-chain thioether moiety of Met766 in hTop2 $\alpha$  and the spatially equivalent Met782 in hTop2 $\beta$  (14,19). In contrast, the N2 $\alpha$  epimer appears to lack the capacity to form a coordinate bond with Top2 and like etoposide, it stabilizes the Top2cc mainly by non-covalent interactions. Together, these results suggest that the formation of a  $\text{Pt}^{2+}$ -thioether coordinate bond is sensitive to the chirality by which the diammine linker attaches to the aglycone core of etoposide. The enhanced inhibition activity of etoplatin-N2 $\beta$  may be attributed to the existence of a coordinate bond in the resulting drug-arrested Top2cc.

### The Top2-mediated DNA breaks arrested by etoplatin-N2 $\beta$ are practically irreversible

The Top2-mediated double-strand DNA breaks formed in the presence of clinically active hTop2-targeting anticancer drugs are inherently reversible; the two enzyme-tethered, complementary cohesive DNA ends harbored in a Top2cc can be rejoined under conditions where the reversal of transesterification reaction is favored (33–35). For example, exposing the drug-stabilized Top2cc to the Mg<sup>2+</sup> chelator EDTA before the Top2 activity is permanently blocked by the sequential addition of protein denaturant and protease is known to promote DNA relegation and efficiently restores the integrity of the fragmented DNA, a common technique for assessing the reversibility of Top2cc (34,35). The speculation that a Pt<sup>2+</sup>–thioether coordinate bond is formed between etoplatin-N2 $\beta$  and Top2 predicts an enhanced stability of the resulting cleavage complex, presumably less reversible and thus more resistant to EDTA treatment. Indeed, while the DNA breaks induced by etoposide can be readily reversed by pre-treating the cleavage complex with EDTA, as indicated by the disappearance of the smeared DNA fragments and restoration of the full-length linear substrate DNA, the breakage resulted from etoplatin-N2 $\beta$ -mediated hTop2 poisoning cannot be resealed (Figure 2B and Supplementary Figure S2). Conversely, the N2 $\alpha$  epimer appears to lack the capacity to form a coordinate bond with either human Top2 isoform and like etoposide, it stabilizes the Top2cc mainly by non-covalent interactions (lane 9 in Supplementary Figure S2 and Figure 2B). The production of irreversible, EDTA-resistant DNA breaks by etoplatin-N2 $\beta$  is consistent with its increased potency and provides additional support for its function as a coordinate bond-forming inhibitor.

### Crystallographic analysis of hTop2 $\beta$ in complexes with DNA and etoplatins

To confirm the proposed mechanisms of action for etoplatins, we performed X-ray crystallographic analysis on the etoplatin-stabilized cleavage complexes of hTop2 $\beta$ . Similar to etoposide (14), both etoplatins trap the Top2cc by targeting the enzyme-mediated DNA breaks, with the aglycone core intercalating between the base pairs flanking the cleavage site and the E-ring protruding toward the DNA minor groove to interact with surrounding residues (Figure 3B and C). As expected, the diamine linker extends towards the DNA major groove side and places the reactive dichloroplatinum(II) moiety in the general vicinity of the methionine residue(s) located in helix  $\alpha$ 4 of the Top2 winged-helix domain. For etoplatin-N2 $\beta$ , one of the chloride ions is replaced by the methionyl S $\delta$  of M782 in hTop2 $\beta$  with clear electron density connecting S $\delta$  and Pt<sup>2+</sup>, indicating that a coordinate bond with a refined bond length of 2.3 Å is formed (Figure 3A and Supplementary Figure S3A). Due to the structural constraints imposed by the alternative stereochemistry at the C4 chiral center, the dichloroplatinum(II) moiety of etoplatin-N2 $\alpha$  is directed closer to the +1/+4 bp, which positions the Pt<sup>2+</sup> more distantly (~4.3 Å) from the methionyl S $\delta$  (Figure 3C and Supplementary Figure S3B). No coordinate bond formation was observed and both of the Pt<sup>2+</sup>-ligating chloride ions are retained in

etoplatin-N2 $\alpha$ . Although the crystal structures of etoplatin-bound hTop2 $\alpha$  are not yet available, structural modeling analysis predicted that hTop2 $\alpha$  would form a coordinate bond with the bound etoplatin-N2 $\beta$  via the methionyl S $\delta$  of M766 (corresponding to M782 in hTop2 $\beta$ ) (Supplementary Figure S4A). In contrast, etoplatin-N2 $\alpha$  would not coordinate with either M766 or M762 because their S $\delta$  are too distant from the coordination sphere of Pt<sup>2+</sup> to replace the Cl<sup>-</sup> ligand (Supplementary Figure S4B and C). Together, the results obtained from crystallographic and modeling analyses provide convincing evidence that etoplatin-N2 $\beta$  acts as a potent and irreversible poison of human Top2 isoforms through its coordinate bond forming capability.

We have shown previously that the conventional non-covalent Top2-targeting drugs can be released from the crystallized Top2 cleavage complex by an overnight soaking of the respective crystals in a drug-free substitute mother liquor and that the binding of a different drug can be achieved by another overnight soaking of these pre-treated crystals in a solution containing the new drug (16). When subjected to this two-step soaking procedure with another hTop2-targeting drug mitoxantrone being added in the second soaking solution, we observed the persistent presence of etoplatin-N2 $\beta$  in the DNA cleavage site even when the length of the second soaking step was extended to 1 week (Supplementary Figure S5). The bound N2 $\alpha$  epimer, in contrast, behaved like etoposide and can be efficiently replaced following the same treatment. This result demonstrates that the coordinate bond formation confers remarkable stability to the etoplatin-N2 $\beta$ -stabilized Top2 cleavage complex, which in turn contributes to its enhanced Top2-poisoning activity.

### The coordinate tether between etoplatin-N2 $\beta$ and hTop2 exhibits a protein conformation-dependent reversibility

Earlier solution nuclear magnetic resonance analysis of the methionine-conjugated platinum(II) diammine complexes revealed that the mono-methionine derivative was susceptible to competition by guanosine 5'-monophosphate, as shown by the release of the Pt<sup>2+</sup>-ligated methionine, whereas the bis-methionine compound was substantially more resistant to ligand replacement and thus displayed greater stability in an aqueous solution (36). The presence of only a single Pt<sup>2+</sup>–thioether linkage between etoplatin-N2 $\beta$  and hTop2 suggests that the resulting tetracoordinate Pt<sup>2+</sup> center is chemically similar to the more labile mono-methionine compound. Nevertheless, the coordinate bond formed between the cleavage site-bound etoplatin-N2 $\beta$  and hTop2 $\beta$ <sup>core</sup> exhibited an outstanding stability (Supplementary Figure S5). We speculated that the compound's podophyllotoxin moiety may contribute substantially to the enhanced stability by not only delivering the Pt<sup>2+</sup> center to react with the thioether group of M782 in a site-specific manner, but also providing non-covalent interactions to sustain the Pt<sup>2+</sup>–thioether bond by keeping the metal/ligand pair in close proximity. To examine the validity of this hypothesis, we tested whether the bound etoposide-N2 $\beta$  can dissociate from Top2cc upon GdnHCl-induced protein denaturation (Figure 4A). As expected, an increase in the Pt<sup>2+</sup> concentration from the detached

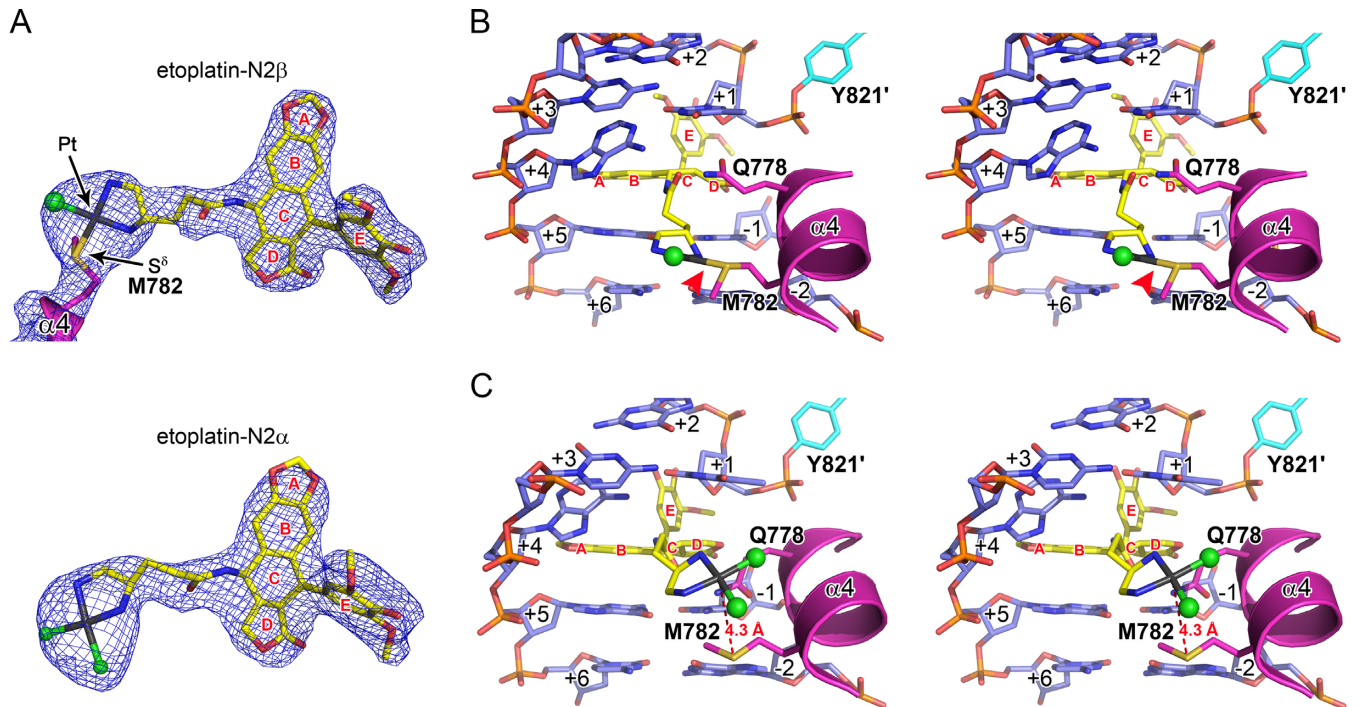

**Figure 3.** Both etoplatin-N2 $\beta$  and -N2 $\alpha$  bind to the DNA cleavage sites in the hTop2 $\beta$ cc crystal structure as etoposide but only etoplatin-N2 $\beta$  forms the irreversible Pt<sup>2+</sup>–thioether coordinate bond. (A) The electron density maps of the bound drugs in the crystal structures of hTop2 $\beta$ <sup>core</sup>-derived cleavage complexes stabilized by etoplatin-N2 $\beta$  (upper panel) and etoplatin-N2 $\alpha$  (lower panel). The final 2D $F_o$ –m $F_c$  maps (at 1.5  $\sigma$ ) of the respective drugs are shown as blue meshes. Continuous electron density can be observed between Pt<sup>2+</sup> and the S<sup>6</sup> of M782, indicating the formation of a coordinate bond. (B and C) Stereo views of the drug-binding site in the etoplatin-N2 $\beta$ - and etoplatin-N2 $\alpha$ -stabilized cleavage complexes derived from hTop2 $\beta$ <sup>core</sup>, respectively. The Pt<sup>2+</sup>–thioether coordination in the etoplatin-N2 $\beta$ -stabilized structure in B is specified by the red arrow. DNA is shown in sticks representation (blue) and labeled with positive and negative numbers to designate nucleotides downstream and upstream, respectively, of the scissile phosphate. The bound drugs are shown in sticks representation (yellow) with the Pt<sup>2+</sup> in gray and Cl<sup>-</sup> in green spheres. The drug's aromatic rings are labeled in red letters. The two protein chains are shown in a cartoon/stick representation and colored in magenta and cyan, respectively. The scissile phosphate-linked active site Y821 is labeled with a prime to specify that this residue is from the second protein chain.

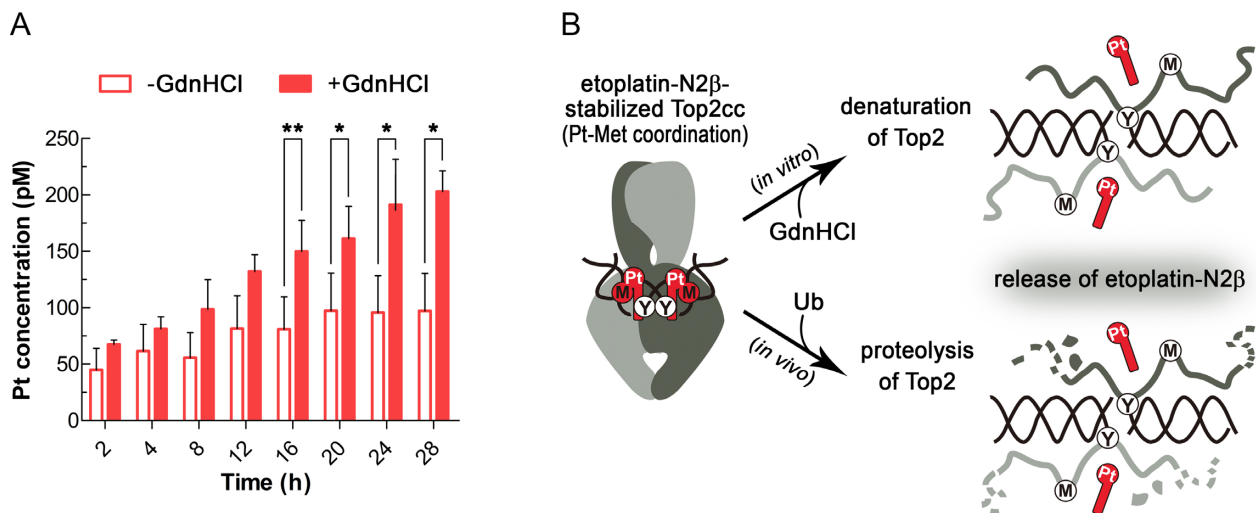

**Figure 4.** The etoplatin-N2 $\beta$ -mediated Pt<sup>2+</sup>–thioether coordination relies on the integrity of the hTop2cc structure. (A) The release of etoplatin-N2 $\beta$  (as reflected by the amount of membrane permeable Pt<sup>2+</sup>) from structurally intact guanidine hydrochloride (-GdnHCl) and denatured (+GdnHCl) Top2cc derived from hTop2 $\alpha$ <sup>CTD</sup> was quantified by inductively coupled plasma mass spectrometry (ICP-MS). The membrane permeable Pt<sup>2+</sup> level of the +GdnHCl group gradually increases with time and was significantly higher than the -GdnHCl group started from 16 h. (\*:  $P < 0.05$ , \*\*:  $P < 0.01$ ) (B) Cartoon representations illustrating that the release of etoplatin-N2 $\beta$  from Top2cc upon GdnHCl treatment (*in vitro* route) may be achieved by targeting Top2 to the 26S proteasome for degradation (*in vivo* route). Specifically, the trapped Top2cc on genomic DNA in the cell will be ubiquitinated (Ub) and channeled to the 26S proteasome for degradation (46,47). Upon structural disruption of its binding site, etoplatin-N2 $\beta$  can no longer form stable coordination with the targeting methionine, allowing its release from the protein.



etoplatin-N2 $\beta$ , as judged by its ability to pass through an ultrafiltration membrane (M.W. cutoff: 10 kDa), was observed in the presence of GdnHCl (Figure 4A). In contrast, for the untreated sample, no significant membrane permeable signal of Pt<sup>2+</sup> could be detected after 28 h of incubation at 37°C. This result supports the importance of non-covalent interactions in stabilizing the coordinate bond. Moreover, it can be inferred that the strength of a metal-protein linkage may be reduced upon disruption of the protein structure. Therefore, the apparently irreversible trapping of Top2cc by etoplatine-N2 $\beta$  exhibits protein conformation-dependent reversibility.

### Cellular Top2s can be targeted by etoplatin-N2 $\beta$ but at a reduced potency

The enhanced potency of etoplatin-N2 $\beta$  in poisoning human Top2s, as observed in the various *in vitro* assays shown above (Figure 2; Supplementary Figures S1 and 2), implicated that this new compound might exhibit a stronger cytotoxicity than etoposide. To determine whether hTop2 $\alpha$  and hTop2 $\beta$  can indeed be targeted by etoplatins *in vivo*, the comet and 4-day 3-(4,5-Dimethylthiazol-2-yl)-2,5-diphenyltetrazolium bromide (MTT) cytotoxicity assays were performed using the human HL-60 and its hTop2-deficient HL-60/MX2 leukemia cell lines. It has been well documented that the mRNA and protein levels of both hTop2 $\alpha$  and hTop2 $\beta$  are greatly reduced in HL-60/MX2 cells, thus rendering them more resistant to various hTop2-targeting drugs, including etoposide (28). As expected, etoplatin-N2 $\beta$  was found to be more effective than the N2 $\alpha$  epimer in causing chromosomal DNA fragmentation and cancer cell killing (Figure 5 and Supplementary Table S1). In addition, the population of HL-60/MX2 cells with DNA damage was significantly lower than HL-60 cells after treatments with both etoplatin-N2 $\beta$  and N2 $\alpha$ , which is consistent with the involvement of hTop2cc in causing the drug-induced DNA fragmentation. The finding that etoplatin-N2 $\beta$  caused >90% (98.3  $\pm$  2.2) and <10% (3.5  $\pm$  1.0) of cell death in HL-60 and HL-60/MX-2 cells, respectively, further suggests the drug-induced chromosomal breakage is a key determinant for the cytotoxicity of etoplatins (Figure 5C). However, these assays also revealed that etoposide was more potent than both etoplatins in inducing DNA damage and cell death (Figure 5 and Supplementary Table S1). We envision four possibilities that may account for the discrepancy between the results obtained from *in vitro* and cell-based assays. First, replacement of the glycosidic group by an amide-linked *cis*-dichlorodiammineplatinum(II) moiety may cause etoplatins to be less efficiently taken up or more avidly effluxed by cells than etoposide. Second, the reactive Pt<sup>2+</sup> center is attached to the etoposide's aglycone core via an amide linkage. It is possible that this amide bond may be hydrolyzed by an unknown amidase in cells, which would compromise the efficacy of the new compounds. Third, the efficacy of the new compounds may be suppressed by their interactions with other cellular components. For example, etoplatins may be modified and even deactivated by reacting with the thiol group of cellular glutathione. Finally, it is possible that only a small percentage of the new compounds enters the nucleus to interact with Top2, whereas the ma-

ajority of them were trapped at other cellular compartments. Additional efforts would be required to pin down the actual cause(s) of this discrepancy.

### DISCUSSION

In this work, we conducted structure-based modification of the clinically active anticancer drug etoposide to produce an organoplatinum compound (Figure 1), etoplatin-N2 $\beta$ , which exhibits potent Top2-poisoning activity (Figure 2). The podophyllotoxin core of this new compound offers binding specificity with the Top2-mediated DNA cleavage site and the appended *cis*-dichlorodiammineplatinum(II) moiety strengthens the drug-protein interaction by forming a Pt<sup>2+</sup>-thioether coordinate bond with a flanking methionine residue (Figure 3A and B). Our results clearly show that selective targeting of a specific methionine residue in the protein can be achieved by exploiting the Pt<sup>2+</sup> coordination chemistry and that the combination of a single Pt<sup>2+</sup>-thioether linkage and non-covalent interactions between the drug and protein is sufficient to increase the stability of the resulting Top2-DNA-drug ternary complex.

Patients receiving Top2-targeting anticancer drugs are at risk of developing therapy-related secondary leukemia and cardiac problems (37,38). Mounting evidence suggests that the undifferentiated targeting of both human Top2 isoforms by these drugs is likely the main cause of adverse effects: while poisoning of hTop2 $\alpha$  is sufficient for killing cancer cells, the induction of hTop2 $\beta$ -mediated DNA breaks and chromosome translocation events may result in deleterious side effects (39–42). To overcome these problems, it would be clinically desirable to develop a hTop2 $\alpha$ -specific drug without simultaneous targeting of hTop2 $\beta$ . Structural analysis of the etoposide-bound hTop2 $\alpha$  cleavage complex (Table 1) revealed that, compared to the Pt<sup>2+</sup>-coordinating methionine that was either observed (M782 of hTop2 $\beta$ ) or predicted (M766 of hTop2 $\alpha$ ) in this study, the thioether side chain of the hTop2 $\alpha$ -specific methionine (M762) is located significantly closer to ring C of the bound podophyllotoxin core (Supplementary Figure S6). Therefore, we envision a shorter diammine linker with properly designed stereochemistry would deliver the reactive Pt<sup>2+</sup> center towards M762 to achieve selective targeting of hTop2 $\alpha$  over the  $\beta$ -isoform, which instead, possesses a glutamine (Q778) at the corresponding position. We have taken the first step toward this end by designing a series of synthesizable compounds with altered linker structure and length (Supplementary Figure S7). For all these compounds, structural modeling showed that the Pt<sup>2+</sup> can be placed at  $\sim$ 2.3 Å from the S $\delta$  of M762 to allow coordination bond formation, whereas the simulated distances between Pt<sup>2+</sup> and the S $\delta$  of M766 are much longer (>5.0 Å) and thus preclude bond formation between the two. This analysis suggests that selective targeting of hTop2 $\alpha$  via the isoform-specific M762 may be an achievable goal.

Top2-targeting drugs from different chemical classes may produce distinct DNA cleavage patterns, which may be rationalized in part by the presence of sequence-specific drug-DNA interactions (43). For example, the polar and van der Waals interactions formed between the glycosidic group of etoposide and the +5/–1 bp at the DNA cleav-



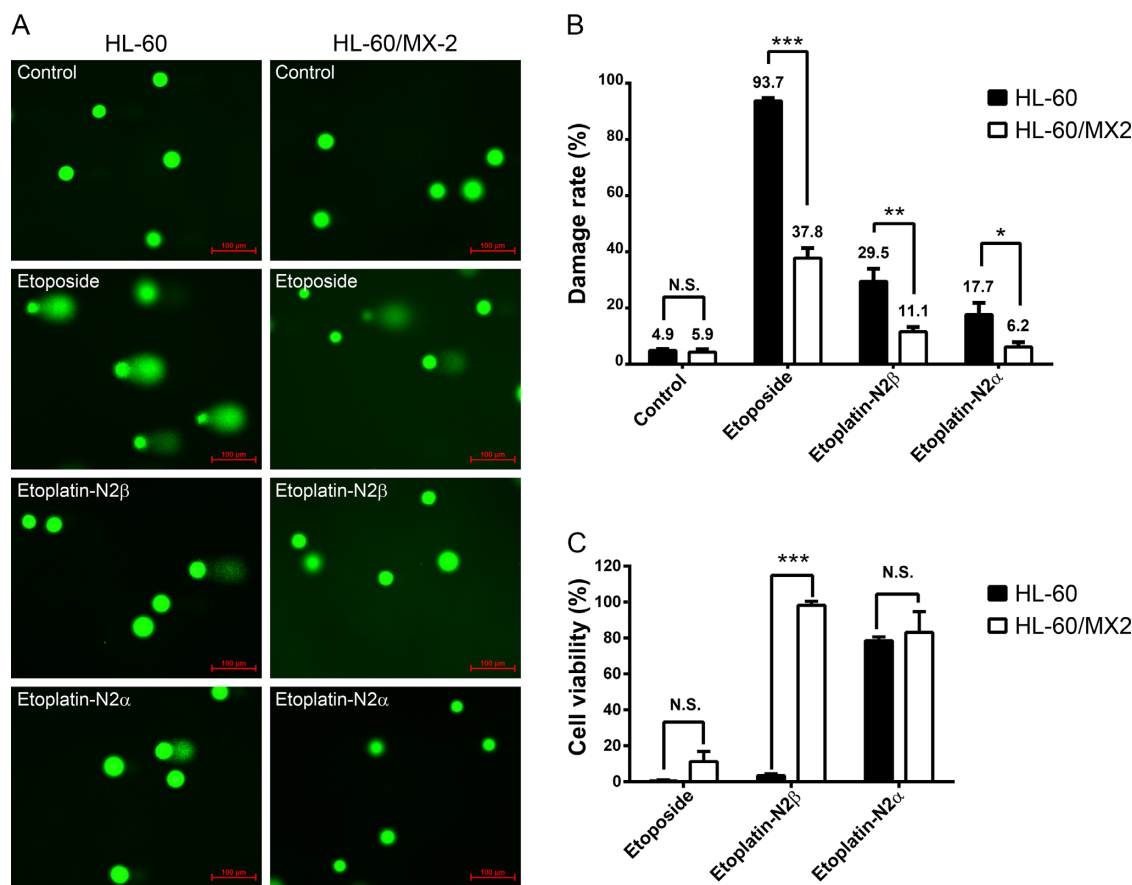

**Figure 5.** Like etoposide, etoplatins induced chromosomal DNA breaks and cancer cell death in a hTop2-dependent manner. (A) Levels of etoposide- and etoplatin-induced chromosomal DNA breaks are significantly reduced in the hTop2-deficient HL-60/MX2 cells compared to the parental HL-60 cells. It has been shown that HL-60/MX2, a mitoxantrone-resistant variant of HL-60 cell line, expresses much lower levels of both hTop2 $\alpha$  and hTop2 $\beta$  (28). Cells were treated with 50  $\mu$ M of etoposide or etoplatins for 1 h, comet assay were then carried out to measure chromosomal DNA breaks and quantified data were shown in (B). In the microscopic images, each green circular head or comet (head + tail) image represents one cell. The green dots are indicative of intact nucleoids containing SC loops of chromosomal DNA attached to the nuclear matrix. Upon drug treatments, damaged nuclear DNA becomes relaxed due to the presence of DNA breaks resulting from drug-stabilized Top2cc and a tail of damaged DNA migrates toward the anode during electrophoresis, leading to the comet-like appearance. Values as determined by the percentage of cells with DNA damage are presented as mean  $\pm$  SD ( $n = 3$ ). (C) Etoplatin-N2 $\beta$  exhibits clear hTop2-dependent cancer cell killing activity. HL-60 leukemia cells were treated with 100  $\mu$ M of etoposide, etoplatin-N2 $\beta$  or etoplatin-N2 $\alpha$ , and after 4 days of incubation, MTT assay were performed to determine cytotoxicity. N.S. (not significant,  $P > 0.05$ ); \* $P < 0.05$ ; \*\* $P < 0.01$ ; \*\*\* $P < 0.001$ .

age site may explain the preference for having a GC base pair at this position (14). Since the glycosidic group was replaced by Pt<sup>2+</sup> reactive center in etoplatins, it is reasonable to anticipate that each compound may produce its own unique Top2-mediated DNA cleavage patterns. Indeed, notable differences were recognized between the DNA cleavage patterns induced respectively by etoposide, etoplatin-N2 $\beta$  and N2 $\alpha$  (Supplementary Figure S2). Structural analysis of the Top2cc stabilized by etoplatin-N2 $\beta$  revealed that the amide moiety of the diammine linker forms hydrogen bonds with both the +5/−1 and +4/+1 bp (Supplementary Figure S3A). In contrast, the diammine linker of etoplatin-N2 $\alpha$  pushes against the +4/+1 bp, resulting in significant displacements of the +5/−1 and +4/+1 bp from their positions seen in the etoposide-bound structure (Supplementary Figure S3B). Given that the sequence of the substrate DNA used in our structural analyses was optimized for etoposide-induced cleavage, the aforementioned differences in drug–

DNA interactions may implicate altered sequence preferences in DNA cleavage.

Unlike clerocidin, an archetypal Top2 inhibitor that irreversibly traps Top2cc by forming permanent covalent bonds with DNA (44,45), a potential advantage of employing Pt<sup>2+</sup>–thioether coordination chemistry in drug design is that the stability of the resulting coordinate tether formed between the drug and its target methionine appears to rely on the existence of drug-mediated non-covalent interactions (Figure 4A). Damage to the structural integrity of the drug binding pocket by protein denaturant is expected to abolish the non-covalent part of the interactions between drug and Top2cc. The accelerated release of etoplatin-N2 $\beta$  from Top2cc in the presence of GdnHCl indicates that the Pt<sup>2+</sup>–thioether linkage was weakened upon protein unfolding (Figure 4B, top panel). Although in this experiment the dissociation of Top2cc-attached etoplatin-N2 $\beta$  is initiated rather artificially by the addition of GdnHCl, we speculate a similar protein unfolding-triggered drug disso-

ciation event may also take place *in vivo*. The repair of double-strand DNA breaks harbored by the drug-arrested Top2cc involves unfolding and 26S proteasome-dependent proteolytic removal of Top2 (46,47), which would disrupt the non-covalent drug-protein contacts and renders the Pt<sup>2+</sup>-thioether bond reversible (Figure 4B, bottom panel). Unlike covalent inhibitors that usually form irreversible adducts with proteins or nucleic acids, the organoplatinum compounds display a protein conformation-dependent reversibility, and hence may be less toxic and antigenic.

Taken together, our results suggest a general approach for developing organoplatinum compounds that permit targeting of a specific methionine residue in proteins: a successful compound should have a collection of suitable pharmacophores that are recognized by the target protein via the formation of a non-covalent complex. The dichloroplatinum(II) moiety of the compound would then coordinate with a nearby methionine side chain to further stabilize the drug-protein interaction. This strategy is expected to allow for effective targeting of any protein with a methionine-containing drug-binding pocket. In addition to the successful development of etoplatin-N2β as a potent hTop2 poison, it appears that bacterial DNA gyrase and a drug-resistant epidermal growth factor receptor (EGFR) variant carrying a T790M mutation would also be ideal candidates for illustrating the applicability of using Pt<sup>2+</sup>-thioether coordination in drug design. The binding site of Novel Bacterial Type II Topoisomerase Inhibitors (NBTIs) that target bacterial DNA gyrase features the presence of several methionine residues (48); introducing a Pt<sup>2+</sup>-containing group into NBTIs may further strengthen protein-drug interaction. Similarly, the T790M mutation, located in the EGFR's ATP-binding site, weakens the interaction between EGFR and the tyrosine kinase inhibitor gefitinib (49). A Pt<sup>2+</sup>-derivatized gefitinib with the ability to coordinate with M790 may restore its association with EGFR. In summary, the integration of the dichloroplatinum(II) moiety into an existing drug, as shown in the development of etoplatin-N2β, may represent an effective technical shortcut for boosting the drug's bioactivity.

## ACCESSION NUMBERS

Atomic coordinates and structure factors have been deposited in the PDB with accession codes 5GWJ (human topoisomerase IIβ with DNA and etoplatin-N2β), 5GWI (human topoisomerase IIβ with DNA and etoplatin-N2α) and 5GWK (human topoisomerase IIα with DNA and etoposide).

## SUPPLEMENTARY DATA

Supplementary Data are available at NAR Online.

## ACKNOWLEDGEMENTS

We thank Prof Chun-Hua Hsu and our lab members for their technical support and commenting on the manuscript. Portions of this research were carried out at beamlines 15A1 and 13B1 of the National Synchrotron Radiation Research Center (Taiwan) and beamline SP12B2 of the Spring-8

(Japan). We are grateful to the staffs of Technology Commons in College of Life Science and Center for Systems Biology, National Taiwan University.

## FUNDING

Ministry of Science and Technology [NSC101-2911-I-002-303, 103-2113-M-002-010-MY3, 104-2911-I-002-302, 106-2113-M-002-021-MY3]; National Research Program for Biopharmaceuticals [NSC101-2325-B-002-049]; National Taiwan University [104R7614-3, 104R7560-4]; Ministry of Education, Taiwan ROC, under the ATU plan (National Chung Hsing University) (to N.L.C.). Funding for open access charge: Ministry of Science and Technology, Taiwan. *Conflict of interest statement.* None declared.

## REFERENCES

- Zarzycka, B., Kuenemann, M.A., Miteva, M.A., Nicolaes, G.A., Vriend, G. and Sperandio, O. (2016) Stabilization of protein-protein interaction complexes through small molecules. *Drug Discov. Today*, **21**, 48–57.
- Potashman, M.H. and Duggan, M.E. (2009) Covalent modifiers: an orthogonal approach to drug design. *J. Med. Chem.*, **52**, 1231–1246.
- Singh, J., Petter, R.C., Baillie, T.A. and Whitty, A. (2011) The resurgence of covalent drugs. *Nat. Rev. Drug Discov.*, **10**, 307–317.
- Lavergne, S.N., Park, B.K. and Naisbitt, D.J. (2008) The roles of drug metabolism in the pathogenesis of T-cell-mediated drug hypersensitivity. *Curr. Opin. Allergy Clin. Immunol.*, **8**, 299–307.
- Utrecht, J. (2009) Immune-mediated adverse drug reactions. *Chem. Res. Toxicol.*, **22**, 24–34.
- Johnson, D.S., Weerapana, E. and Cravatt, B.F. (2010) Strategies for discovering and derisking covalent, irreversible enzyme inhibitors. *Future Med. Chem.*, **2**, 949–964.
- Kettle, S.F.A. (1996) *Physical Inorganic Chemistry: a Coordination Chemistry Approach*. Springer-Verlag Berlin, Heidelberg, Berlin.
- Vos, S.M., Tretter, E.M., Schmidt, B.H. and Berger, J.M. (2011) All tangled up: how cells direct, manage and exploit topoisomerase function. *Nat. Rev. Mol. Cell Biol.*, **12**, 827–841.
- Chen, S.H., Chan, N.L. and Hsieh, T.S. (2013) New mechanistic and functional insights into DNA topoisomerases. *Annu. Rev. Biochem.*, **82**, 139–170.
- Deweese, J.E. and Osheroff, N. (2009) The DNA cleavage reaction of topoisomerase II: wolf in sheep's clothing. *Nucleic Acids Res.*, **37**, 738–748.
- Nitiss, J.L. (2009) Targeting DNA topoisomerase II in cancer chemotherapy. *Nat. Rev. Cancer*, **9**, 338–350.
- Pommier, Y. and Marchand, C. (2012) Interfacial inhibitors: targeting macromolecular complexes. *Nat. Rev. Drug Discov.*, **11**, 25–36.
- Pommier, Y. (2013) Drugging topoisomerases: lessons and challenges. *ACS Chem. Biol.*, **8**, 82–95.
- Wu, C.C., Li, T.K., Farh, L., Lin, L.Y., Lin, T.S., Yu, Y.J., Yen, T.J., Chiang, C.W. and Chan, N.L. (2011) Structural basis of type II topoisomerase inhibition by the anticancer drug etoposide. *Science*, **333**, 459–462.
- Miles, T.J., Hennessy, A.J., Bax, B., Brooks, G., Brown, B.S., Brown, P., Cailleau, N., Chen, D., Dabbs, S., Davies, D.T. *et al.* (2013) Novel hydroxyl tricyclics (e.g., GSK966587) as potent inhibitors of bacterial type IIA topoisomerases. *Bioorg. Med. Chem. Lett.*, **23**, 5437–5441.
- Wu, C.C., Li, Y.C., Wang, Y.R., Li, T.K. and Chan, N.L. (2013) On the structural basis and design guidelines for type II topoisomerase-targeting anticancer drugs. *Nucleic Acids Res.*, **41**, 10630–10640.
- Blower, T.R., Williamson, B.H., Kerns, R.J. and Berger, J.M. (2016) Crystal structure and stability of gyrase-fluoroquinolone cleaved complexes from *Mycobacterium tuberculosis*. *Proc. Natl. Acad. Sci. U.S.A.*, **113**, 1706–1713.
- Veselkov, D.A., Laponogov, I., Pan, X.S., Selvarajah, J., Skamrova, G.B., Branstrom, A., Narasimhan, J., Prasad, J.V., Fisher, L.M. and Sanderson, M.R. (2016) Structure of a quinolone-stabilized cleavage complex of topoisomerase IV from

- Klebsiella pneumoniae and comparison with a related Streptococcus pneumoniae complex. *Acta Crystallogr. D Struct. Biol.*, **72**, 488–496.
19. Wendorff, T.J., Schmidt, B.H., Heslop, P., Austin, C.A. and Berger, J.M. (2012) The structure of DNA-bound human topoisomerase II alpha: conformational mechanisms for coordinating inter-subunit interactions with DNA cleavage. *J. Mol. Biol.*, **424**, 109–124.
  20. Wasserman, R.A., Austin, C.A., Fisher, L.M. and Wang, J.C. (1993) Use of yeast in the study of anticancer drugs targeting DNA topoisomerases: expression of a functional recombinant human DNA topoisomerase II alpha in yeast. *Cancer Res.*, **53**, 3591–3596.
  21. Austin, C.A., Marsh, K.L., Wasserman, R.A., Willmore, E., Sayer, P.J., Wang, J.C. and Fisher, L.M. (1995) Expression, domain structure, and enzymatic properties of an active recombinant human DNA topoisomerase II beta. *J. Biol. Chem.*, **270**, 15739–15746.
  22. Chen, Y.T., Collins, T.R., Guan, Z., Chen, V.B. and Hsieh, T.S. (2012) Probing conformational changes in human DNA topoisomerase II alpha by pulsed alkylation mass spectrometry. *J. Biol. Chem.*, **287**, 25660–25668.
  23. Otwinowski, Z. and Minor, W. *et al.* (1997) Processing of X-ray diffraction data collected in oscillation mode. *Methods Enzymol.*, **276**, 307–326.
  24. Adams, P.D., Afonine, P.V., Bunkoczi, G., Chen, V.B., Davis, I.W., Echols, N., Headd, J.J., Hung, L.W., Kapral, G.J., Grosse-Kunstleve, R.W. *et al.* (2010) PHENIX: a comprehensive Python-based system for macromolecular structure solution. *Acta Crystallogr. D Biol. Crystallogr.*, **66**, 213–221.
  25. Emsley, P., Lohkamp, B., Scott, W.G. and Cowtan, K. (2010) Features and development of Coot. *Acta Crystallogr. D Biol. Crystallogr.*, **66**, 486–501.
  26. Melnik, M. and Mikus, P. (2014) Structure aspects of monomeric platinum coordination complexes. *Mater. Sci. Appl.*, **5**, 512–547.
  27. Ghezzi, A., Aceto, M., Cassino, C., Gabano, E. and Osella, D. (2004) Uptake of antitumor platinum(II)-complexes by cancer cells, assayed by inductively coupled plasma mass spectrometry (ICP-MS). *J. Inorg. Biochem.*, **98**, 73–78.
  28. Harker, W.G., Slade, D.L., Parr, R.L. and Holguin, M.H. (1995) Selective use of an alternative stop codon and polyadenylation signal within intron sequences leads to a truncated topoisomerase II alpha messenger RNA and protein in human HL-60 leukemia cells selected for resistance to mitoxantrone. *Cancer Res.*, **55**, 4962–4971.
  29. Lee, C.H., Hsieh, M.Y., Hsin, L.W., Chen, H.C., Lo, S.C., Fan, J.R., Chen, W.R., Chen, H.W., Chan, N.L. and Li, T.K. (2012) Anthracenedione-methionine conjugates are novel topoisomerase II-targeting anticancer agents with favorable drug resistance profiles. *Biochem. Pharmacol.*, **83**, 1208–1216.
  30. Liu, X., Zhang, L.L., Xu, X.H., Hui, L., Zhang, J.B. and Chen, S.W. (2013) Synthesis and anticancer activity of dichloroplatinum(II) complexes of podophyllotoxin. *Bioorg. Med. Chem. Lett.*, **23**, 3780–3784.
  31. Altman, J., Wilchek, M. and Warshawsky, A. (1985) Platinum(II) complexes with 2,4-diaminobutyric acid, ornithine, lysine and 4,5-diaminovaleric acid. *Inorg. Chim. Acta*, **107**, 165–168.
  32. Hansen, H.F., Jensen, R.B., Willumsen, A.M., Norskovlauritsen, N., Ebbesen, P., Nielsen, P.E. and Buchardt, O. (1993) New compounds related to podophyllotoxin and congeners: synthesis, structure elucidation and biological testing. *Acta Chem. Scand.*, **47**, 1190–1200.
  33. Liu, L.F., Rowe, T.C., Yang, L., Tewey, K.M. and Chen, G.L. (1983) Cleavage of DNA by mammalian DNA topoisomerase II. *J. Biol. Chem.*, **258**, 15365–15370.
  34. Sander, M. and Hsieh, T. (1983) Double strand DNA cleavage by type II DNA topoisomerase from *Drosophila melanogaster*. *J. Biol. Chem.*, **258**, 8421–8428.
  35. Vann, K.R., Sedgeman, C.A., Gopas, J., Golan-Goldhirsh, A. and Osheroff, N. (2015) Effects of olive metabolites on DNA cleavage mediated by Human Type II topoisomerases. *Biochemistry*, **54**, 4531–4541.
  36. Barnham, K.J., Guo, Z. and Sadler, P.J. (1996) Stabilization of monofunctional platinum-nucleotide adducts: reactions of N-acetyl-L-methionine complexes with guanosine 5'-monophosphate and guanylyl(3'-5')guanosine. *J. Chem. Soc., Dalton Trans.*, 2867–2876.
  37. Cowell, I.G. and Austin, C.A. (2012) Mechanism of generation of therapy related leukemia in response to anti-topoisomerase II agents. *Int. J. Environ. Res. Public Health*, **9**, 2075–2091.
  38. Rashidi, A. and Fisher, S.I. (2013) Therapy-related acute promyelocytic leukemia: a systematic review. *Med. Oncol.*, **30**, 625.
  39. Errington, F., Willmore, E., Tilby, M.J., Li, L., Li, G., Li, W., Baguley, B.C. and Austin, C.A. (1999) Murine transgenic cells lacking DNA topoisomerase II beta are resistant to acridines and mitoxantrone: analysis of cytotoxicity and cleavable complex formation. *Mol. Pharmacol.*, **56**, 1309–1316.
  40. Lopez-Lazaro, M., Willmore, E. and Austin, C.A. (2007) Cells lacking DNA topoisomerase II beta are resistant to genistein. *J. Nat. Prod.*, **70**, 763–767.
  41. Pommier, Y., Leo, E., Zhang, H. and Marchand, C. (2010) DNA topoisomerases and their poisoning by anticancer and antibacterial drugs. *Chem. Biol.*, **17**, 421–433.
  42. Zhang, S., Liu, X., Bawa-Khalife, T., Lu, L.S., Lyu, Y.L., Liu, L.F. and Yeh, E.T. (2012) Identification of the molecular basis of doxorubicin-induced cardiotoxicity. *Nat. Med.*, **18**, 1639–1642.
  43. Laponogov, I., Sohi, M.K., Veselkov, D.A., Pan, X.S., Sawhney, R., Thompson, A.W., McAuley, K.E., Fisher, L.M. and Sanderson, M.R. (2009) Structural insight into the quinolone-DNA cleavage complex of type IIA topoisomerases. *Nat. Struct. Mol. Biol.*, **16**, 667–669.
  44. Binascchi, M., Zagotto, G., Palumbo, M., Zunino, F., Farinosi, R. and Capranico, G. (1997) Irreversible and reversible topoisomerase II DNA cleavage stimulated by clerocidin: sequence specificity and structural drug determined. *Cancer Res.*, **57**, 1710–1716.
  45. Pan, X.S., Dias, M., Palumbo, M. and Fisher, L.M. (2008) Clerocidin selectively modifies the gyrase-DNA gate to induce irreversible and reversible DNA damage. *Nucleic Acids Res.*, **36**, 5516–5529.
  46. Xiao, H., Mao, Y., Desai, S.D., Zhou, N., Ting, C.Y., Hwang, J. and Liu, L.F. (2003) The topoisomerase II beta circular clamp arrests transcription and signals a 26S proteasome pathway. *Proc. Natl. Acad. Sci. U.S.A.*, **100**, 3239–3244.
  47. Azarova, A.M., Lyu, Y.L., Lin, C.P., Tsai, Y.C., Lau, J.Y., Wang, J.C. and Liu, L.F. (2007) Roles of DNA topoisomerase II isozymes in chemotherapy and secondary malignancies. *Proc. Natl. Acad. Sci. U.S.A.*, **104**, 11014–11019.
  48. Miles, T.J., Hennessy, A.J., Bax, B., Brooks, G., Brown, B.S., Brown, P., Cailleau, N., Chen, D., Dabbs, S., Davies, D.T. *et al.* (2016) Novel tricyclics (e.g., GSK945237) as potent inhibitors of bacterial type IIA topoisomerases. *Bioorg. Med. Chem. Lett.*, **26**, 2464–2469.
  49. Yun, C.H., Boggon, T.J., Li, Y., Woo, M.S., Greulich, H., Meyerson, M. and Eck, M.J. (2007) Structures of lung cancer-derived EGFR mutants and inhibitor complexes: mechanism of activation and insights into differential inhibitor sensitivity. *Cancer cell*, **11**, 217–227.
